# Supplementary material for: Orally administered neohesperidin attenuates MPTP-induced neurodegeneration by inhibiting inflammatory responses and regulating intestinal flora in mice
Source: Royal Society of Chemistry journal article supplement (doi:10.1039/d3fo04714h), 2024-01-01

### The original gels in Figure 2

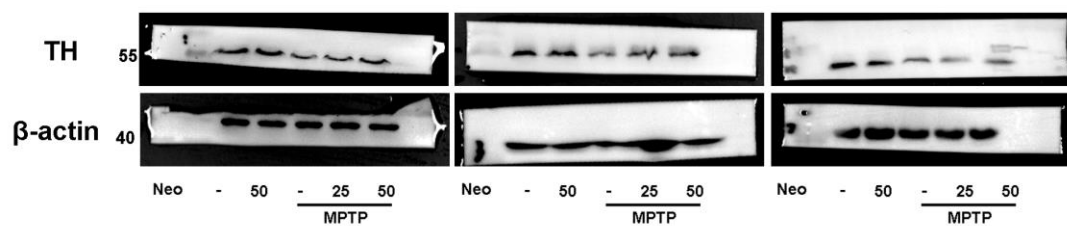

### The original gels in Figure 3

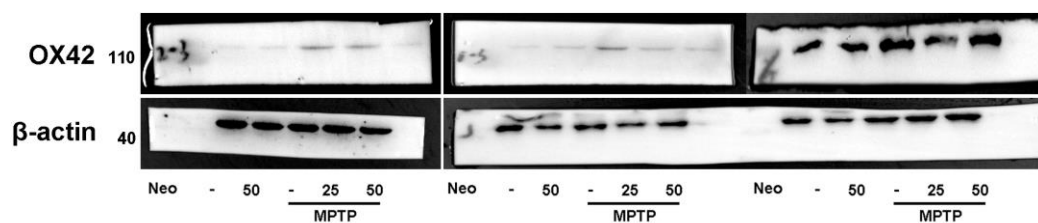

### The original gels in Figure 6

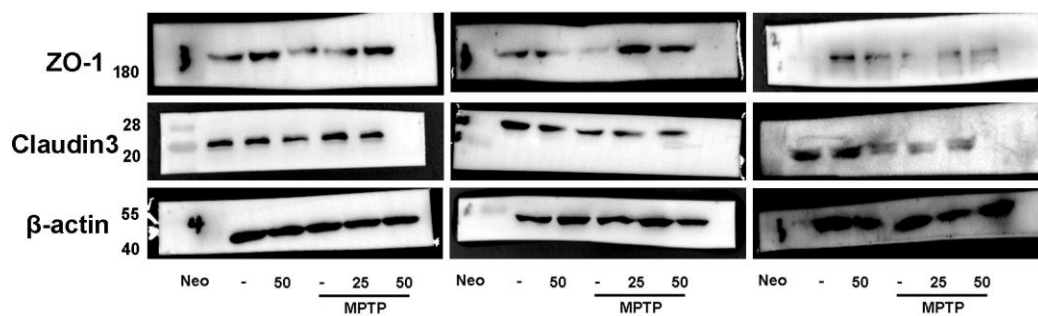

The original gels in Figure 7 A

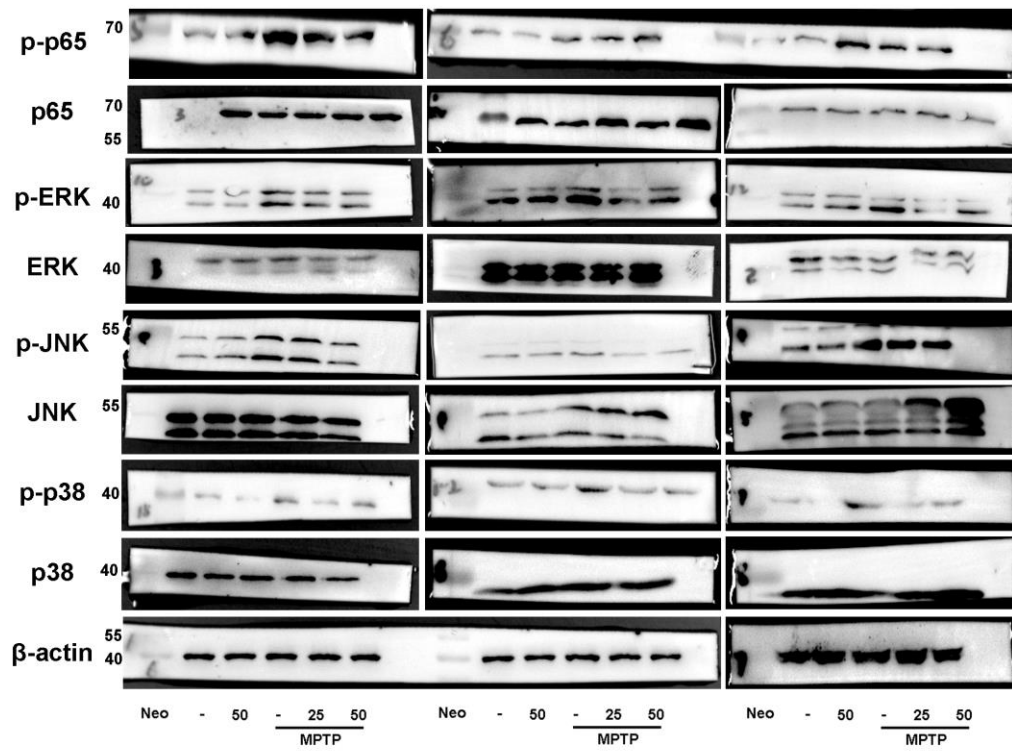

The original gels in Figure 7 F

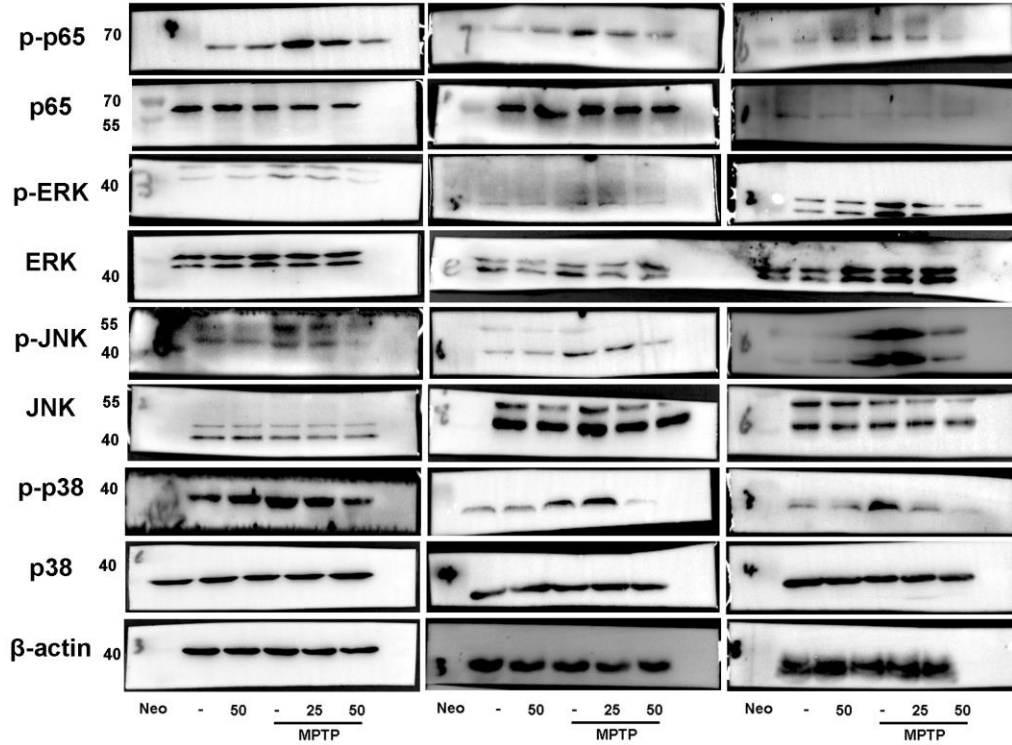

## The original gels in Figure 9

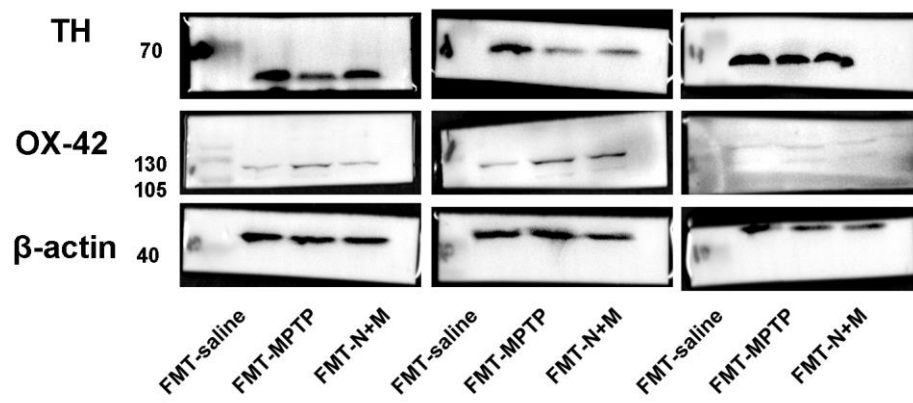

Supplement: d3fo04714h1.pdf [file d3fo04714h1.pdf]
